# Supplementary material for: Acute Effect of Three Aerobic Exercise Intensities on Glomerular Filtration Rate in Healthy Older Adults
Source: Preprints.org preprint supplement (doi:10.20944/preprints202409.1031.v1), 2024-09-13
Supplement: Supplementary file 1 [file supplementary]

Supplementary file

| **Table I.** Equations to estimate filtration glomerular rate by serum creatinine and cystatin C. | | |
| --- | --- | --- |
| Gender | Serum Creatinine (SCr), mg·dL-1 | |
| Female | For ≤0.7 | 144 x (SCr/0.7)-0.329 x 0.993Age |
| Female | For >0.7 | 144 x (SCr/0.7)-1.209 x 0.993Age |
| Male | For ≤0.9 | 141 x (SCr/0.9)-0.411 x 0.993Age |
| Male | For >0.9 | 141 x (SCr/0.9)-1.209 x 0.993Age |
|  | Serum Cystatin (SCys), mg·dL-1 | |
| Female or Male | For ≤0.8 | 133 x (SCys/0.8)-0.499 x 0.996Age x 0.932 if female |
| Female or Male | For >0.8 | 133 x (SCys/0.8)-1.328 x 0.996Age x 0.932 if female |

Data from Inker et al. (2012).

| **Table II. Effect of exercise tests on** e**stimated glomerular filtration rate.** | | | | | | |
| --- | --- | --- | --- | --- | --- | --- |
| Estimated by Cystatin C, mL·min·1.73 m2 | | | | | | |
|  | Maximal | | 80% of maximal heart rate | | 60% of maximal heart rate | |
| ID | Basal | Final | Basal | Final | Basal | Final |
| 1 | 105.2 | 118.7 | 111.2 | 117.0 | 116.4 | 115.6 |
| 2 | 71.8 | 72.9 | 78.9 | 89.3 | 70.9 | 116.1 |
| 3 | 76.7 | 81.1 | 76.7 | 91.3 | 83.5 | 82.3 |
| 4 | 112.3 | 112.9 | 104.8 | 101.5 | 104.1 | 109.1 |
| 5 | 120.5 | 147.4 | 48.4 | 105.9 | 103.5 | 110.3 |
| 6 | 106.6 | 83.0 | 101.3 | 105.7 | 99.3 | 82.0 |
| 7 | 107.8 | 111.8 | 93.1 | 71.4 | 109.4 | 91.2 |
| 8 | 91.7 | 106.6 | 97.6 | 129.1 | 105.2 | 112.7 |
| 9 | 70.3 | 64.7 | 102.1 | 105.0 | 75.0 | 108.7 |
| 10 | 106.3 | 95.6 | 77.9 | 95.1 | 93.0 | 89.9 |
| 11 | 74.6 | 100.3 | 93.8 | 68.3 | 103.6 | 86.5 |
| 12 | 109.2 | 105.4 | 105.9 | 107.4 | 100.1 | 96.7 |
| 13 | 107.3 | 114.8 | 104.5 | 107.4 | 108.8 | 153.3 |
| 14 | 105.5 | 111.2 | 104.7 | 106.7 | 102.3 | 143.9 |
| 15 | 110.3 | 113.3 | 120.8 | 123.6 | 124.6 | 122.2 |
| 16 | 108.1 | 126.5 | 117.0 | 111.6 | 98.8 | 117.0 |
| 17 | 103.6 | 107.5 | 96.7 | 137.8 | 97.4 | 105.6 |
| 18 | 99.8 | 98.9 | 95.8 | 78.2 | 94.0 | 82.8 |
|  | Estimated by Creatinine, mL·min·1.73 m2 | | | | | |
| 1 | 93.3 | 97.7 | 104.8 | 102.3 | 100.2 | 108.3 |
| 2 | 50.5 | 58.4 | 50.5 | 51.2 | 50.5 | 56.2 |
| 3 | 52.6 | 50.0 | 58.0 | 68.9 | 64.4 | 71.3 |
| 4 | 86.8 | 91.7 | 87.2 | 83.1 | 85.1 | 84.9 |
| 5 | 91.1 | 87.2 | 81.3 | 90.4 | 81.3 | 80.7 |
| 6 | 70.3 | 48.6 | 70.3 | 72.9 | 48.9 | 53.1 |
| 7 | 89.8 | 89.0 | 89.3 | 75.0 | 80.3 | 81.1 |
| 8 | 72.5 | 72.0 | 70.1 | 62.1 | 61.2 | 62.0 |
| 9 | 79.3 | 68.3 | 73.8 | 75.4 | 62.6 | 54.4 |
| 10 | 49.5 | 43.8 | 66.2 | 69.7 | 54.1 | 53.6 |
| 11 | 69.1 | 69.9 | 51.6 | 55.8 | 55.9 | 56.5 |
| 12 | 93.7 | 96.9 | 85.0 | 91.0 | 85.0 | 107.4 |
| 13 | 99.0 | 105.3 | 97.3 | 97.9 | 87.0 | 85.8 |
| 14 | 88.1 | 93.5 | 57.2 | 71.4 | 59.4 | 55.6 |
| 15 | 61.5 | 71.0 | 59.3 | 58.5 | 43.2 | 43.4 |
| 16 | 95.0 | 99.8 | 84.9 | 76.0 | 54.1 | 90.6 |
| 17 | 77.6 | 70.7 | 96.5 | 99.0 | 71.1 | 67.8 |
| 18 | 57.6 | 52.2 | 51.3 | 68.1 | 65.4 | 48.3 |
